# Supplementary material
Source: HighWire-hosted journal article supplement (https://www.cmajopen.ca/highwire/filestream/81278/field_highwire_adjunct_files/0/2019-0138-1-at.pdf)
Supplement: 2019-0138-1-at.pdf [file 2019-0138-1-at.pdf]

Appendix 1 (as supplied by the authors): Data collection form

Retrospective form for Undergrad Reps to discuss with their schools

CONTACT INFORMATION

University

Contact e-mail

Contact name

Contact Phone

INSTRUCTIONS

Column C: For each year, indicate the number of students graduating.

Column D: Indicate the number of students that completed any type of palliative care rotation at any point in their training. Count each student only once.

Columns E through L: Provide details of the rotations, as shown in the example for 2007

| Graduating year | Number of students graduating in the current year | Number of students who completed a palliative care clinical rotation at any point in their training. Report each student only once, even if they completed more than one rotation | Type of rotation |          | Length of rotation (if known) |         |         |   | Other (please specify in the comments)                                                                           | Comments |
|-----------------|---------------------------------------------------|-----------------------------------------------------------------------------------------------------------------------------------------------------------------------------------|------------------|----------|-------------------------------|---------|---------|---|------------------------------------------------------------------------------------------------------------------|----------|
|                 |                                                   |                                                                                                                                                                                   | Mandatory        | Elective | 1 week                        | 2 weeks | 4 weeks |   |                                                                                                                  |          |
| 2007 (example)* | 200                                               | 75                                                                                                                                                                                | 0                | 78       | 5                             | 65      | 6       | 2 | The 2 "other" students completed a 6-week rotation. Three students did a 1-week rotation plus a 4-week rotation. |          |
| 2008            |                                                   |                                                                                                                                                                                   |                  |          |                               |         |         |   |                                                                                                                  |          |
| 2009            |                                                   |                                                                                                                                                                                   |                  |          |                               |         |         |   |                                                                                                                  |          |
| 2010            |                                                   |                                                                                                                                                                                   |                  |          |                               |         |         |   |                                                                                                                  |          |
| 2011            |                                                   |                                                                                                                                                                                   |                  |          |                               |         |         |   |                                                                                                                  |          |
| 2012            |                                                   |                                                                                                                                                                                   |                  |          |                               |         |         |   |                                                                                                                  |          |
| 2013            |                                                   |                                                                                                                                                                                   |                  |          |                               |         |         |   |                                                                                                                  |          |
| 2014            |                                                   |                                                                                                                                                                                   |                  |          |                               |         |         |   |                                                                                                                  |          |
| 2015            |                                                   |                                                                                                                                                                                   |                  |          |                               |         |         |   |                                                                                                                  |          |
| 2016            |                                                   |                                                                                                                                                                                   |                  |          |                               |         |         |   |                                                                                                                  |          |

\*In the example, 200 students graduated from medical school in 2007. Of these, 75 individuals received palliative care clinical rotations. None had mandatory rotations.

Most had 2 week rotations. Five had 1 week, 6 had 4 weeks, and two had a 6 week rotation.

Three of the five students who had 1 week rotations also completed an additional 4-week rotation.

**Postgrad Data Collection form for reps to discuss with their schools (July 10, 2017)**

**IDENTIFICATION**

University  
 Contact name  
 Contact e-mail  
 Contact Phone

Please for each year, complete this sheet by specialty and subspecialty. Scroll to choose from the drop-down menu. Anytime you choose other, please specify in the comment column.  
 If you have to list many specialty or subspecialty, please start over following the example.

| Year (2008-2017)<br><i>Please choose the year you are reporting from the drop-down menu</i> | Specialty<br><i>Please choose the specialty you are reporting from the drop-down menu</i> | Number of students completing their studies in this specialty this current year | Mandatory                                                                     |                                                              |                                                        | Elective                                                                     |                                                              |                                                        | Selective                                                                     |                                                              |                                                        | Comments |
|---------------------------------------------------------------------------------------------|-------------------------------------------------------------------------------------------|---------------------------------------------------------------------------------|-------------------------------------------------------------------------------|--------------------------------------------------------------|--------------------------------------------------------|------------------------------------------------------------------------------|--------------------------------------------------------------|--------------------------------------------------------|-------------------------------------------------------------------------------|--------------------------------------------------------------|--------------------------------------------------------|----------|
|                                                                                             |                                                                                           |                                                                                 | # Students completing mandatory palliative care rotation in this subspecialty | Subspecialty<br><i>Please choose from the drop-down menu</i> | Length<br><i>Please choose from the drop-down menu</i> | # Students completing elective palliative care rotation in this subspecialty | Subspecialty<br><i>Please choose from the drop-down menu</i> | Length<br><i>Please choose from the drop-down menu</i> | # Students completing selective palliative care rotation in this subspecialty | Subspecialty<br><i>Please choose from the drop-down menu</i> | Length<br><i>Please choose from the drop-down menu</i> |          |
| eg. 2008                                                                                    | Internal medicine                                                                         | 25                                                                              | 10                                                                            | Medical Oncology                                             | 1 week                                                 | 5                                                                            | Cardiology                                                   | 1 week                                                 | 1                                                                             | Respirology                                                  | 4 weeks                                                |          |
| 2008                                                                                        | Internal medicine                                                                         |                                                                                 |                                                                               |                                                              |                                                        | 3                                                                            | Pain                                                         | 2 weeks                                                |                                                                               |                                                              |                                                        |          |
| 2008                                                                                        | Radio-oncology                                                                            | 5                                                                               | 5                                                                             |                                                              |                                                        |                                                                              |                                                              |                                                        |                                                                               |                                                              |                                                        |          |
| 2008                                                                                        | Neurosurgery                                                                              | 5                                                                               | 0                                                                             |                                                              |                                                        | 1                                                                            |                                                              | 1 week                                                 |                                                                               |                                                              |                                                        |          |
| 2009                                                                                        | Family medicine                                                                           | 30                                                                              | 2                                                                             | AFC Diploma                                                  |                                                        |                                                                              |                                                              |                                                        | 2                                                                             |                                                              | 4 weeks                                                |          |
| 2009                                                                                        | Family medicine                                                                           | 25                                                                              | 5                                                                             | AFC Diploma                                                  |                                                        | 5                                                                            |                                                              | 2 weeks                                                |                                                                               |                                                              |                                                        |          |
